# Supplementary material
Source: ML conference proceedings conference paper supplement (https://proceedings.neurips.cc/paper_files/paper/2013/hash/49182f81e6a13cf5eaa496d51fea6406-Abstract.html)
Supplement: Supplementary file [file 49182f81e6a13cf5eaa496d51fea6406-Supplemental.zip]

## A Proof of Proposition 2

*Proof.* Fix  $f, g \in \Gamma_0$ . First note that the Fenchel conjugation enjoys (and is characterized by) the order reversing property:

$$f \geq g \iff f^* \leq g^*.$$

Since  $(M_f^\mu)^* = f^* + \mu q \in \text{SC}_\mu$  we have  $M_f^\mu \in \text{SS}_{1/\mu}$ . On the other hand, let  $h \in \text{SS}_{1/\mu}$ . Then  $g = h^* - \mu q \in \Gamma_0$ , hence  $h^* = g + \mu q$  and  $h = (g + \mu q)^* = M_{g^*}^\mu$ . Therefore  $M^\mu$  is onto.

It should be clear that  $M^\mu : \Gamma_0 \rightarrow \text{SS}_{1/\mu}$  is increasing w.r.t. the pointwise order, i.e.,  $f \geq g \implies M_f^\mu \geq M_g^\mu$ . On the other hand,  $M_f^\mu \geq M_g^\mu \implies (M_f^\mu)^* \leq (M_g^\mu)^*$ , which, by **i**) in Proposition 1, means  $f^* + \mu q \leq g^* + \mu q \implies f^* \leq g^* \implies f = f^{**} \geq g^{**} = g$ . Hence  $M^\mu$  is an injection.

Let  $\alpha \in ]0, 1[$ , then

$$\begin{aligned} M_{\alpha f + (1-\alpha)g}^\mu(x) &= \min_y \frac{1}{2\mu} \|x - y\|^2 + \alpha f(y) + (1-\alpha)g(y) \\ &= \min_y \frac{\alpha}{2\mu} \|x - y\|^2 + \alpha f(y) + \frac{1-\alpha}{2\mu} \|x - y\|^2 + (1-\alpha)g(y) \\ &\geq \min_y \frac{\alpha}{2\mu} \|x - y\|^2 + \alpha f(y) + \min_y \frac{1-\alpha}{2\mu} \|x - y\|^2 + (1-\alpha)g(y) \\ &= \alpha M_f^\mu(x) + (1-\alpha)M_g^\mu(x), \end{aligned}$$

verifying the concavity of  $M^\mu$ . □

## B Proof of Proposition 3

*Proof.* First observe that by the definition of the proximal average

$$\bar{f} - M_{A^\mu}^\mu = \sum_k \alpha_k (f_k - M_{f_k}^\mu) \geq 0,$$

since  $f \geq M_f^\mu$  for any  $f \in \Gamma_0$ . On the other hand

$$\begin{aligned} \sup_x f_k(x) - M_{f_k}^\mu(x) &= \sup_x f_k(x) - \min_y \frac{1}{2\mu} \|x - y\|^2 + f_k(y) \\ &= \sup_{x,y} f_k(x) - f_k(y) - \frac{1}{2\mu} \|x - y\|^2 \\ &\leq \sup_{x,y} M_k \|x - y\| - \frac{1}{2\mu} \|x - y\|^2 \\ &\leq \frac{\mu M_k^2}{2}, \end{aligned}$$

where the first inequality is due to the Lipschitz assumption on  $f_k$ . Therefore

$$\sup_x \bar{f}(x) - M_{A^\mu}^\mu(x) \leq \sum_k \alpha_k \left[ \sup_x f_k(x) - M_{f_k}^\mu(x) \right] \leq \frac{\mu \bar{M}^2}{2}.$$

□

## C Proof of Theorem 1

*Proof.* Clearly, under our choice of  $\mu$ , the gradient of  $\ell$  is  $1/\mu$ -Lipschitz continuous (since  $1/\mu \geq L_0$ ). Therefore after at most  $\sqrt{\frac{2}{\mu\epsilon}} \|x_0 - x\|$  steps the output of Algorithm 1, say  $\tilde{x}$ , satisfies [2]

$$\ell(\tilde{x}) + A^\mu(\tilde{x}) \leq \ell(x) + A^\mu(x) + \epsilon.$$

Then by Proposition 4

$$\begin{aligned} [\ell(\tilde{x}) + \bar{f}(\tilde{x})] - [\ell(x) + \bar{f}(x)] &= [\ell(\tilde{x}) + A^\mu(\tilde{x})] - [\ell(x) + A^\mu(x)] \\ &\quad + [\bar{f}(\tilde{x}) - A^\mu(\tilde{x})] - [\bar{f}(x) - A^\mu(x)] \\ &\leq \epsilon + \epsilon + 0 = 2\epsilon. \end{aligned}$$

The proof for Algorithm 2 is similar. □
